# Supplementary material for: The Effect of Liquid Meal Replacements on Cardiometabolic Risk Factors in Overweight/Obese Individuals With Type 2 Diabetes: A Systematic Review and Meta-analysis of Randomized Controlled Trials
Source: Oxford University Press journal article supplement (doi:10.2337/dc18-2270), 2019-03-28

## SUPPLEMENTARY DATA

**Supplementary Table 1.** Search strategy to identify randomized controlled trials investigating the effect of liquid meal replacements on cardiometabolic risk factors in overweight/obese individuals with type 2 diabetes

| MEDLINE through December 10, 2018                                                                                                                                                                                                                                                                                                                                                                                                                                                                                                                                                                                                                                                                                                                                                                                                                                                                                                                                                                                                                                                                                                                                                                                                                                                                                                                                                                                                                                                  | EMBASE through December 10, 2018                                                                                                                                                                                                                                                                                                                                                                                                                                                                                                                                                                                                                                                                                                                                                                                                                                                                                                                                                                                                                                                                                                                                                                                                                                                                                                                                                                                                                                                                         | Cochrane Central Register of Controlled Trials through December 10, 2018                                                                                                                                                                                                                                                                                                                                                                                                                                                                                                                                                                                                                                                                                                                                                                                                                                                                                                                                                                                                                                                                                                                                                                                                                                                                                                                                                                                                                                                                                                                                                                        |
|------------------------------------------------------------------------------------------------------------------------------------------------------------------------------------------------------------------------------------------------------------------------------------------------------------------------------------------------------------------------------------------------------------------------------------------------------------------------------------------------------------------------------------------------------------------------------------------------------------------------------------------------------------------------------------------------------------------------------------------------------------------------------------------------------------------------------------------------------------------------------------------------------------------------------------------------------------------------------------------------------------------------------------------------------------------------------------------------------------------------------------------------------------------------------------------------------------------------------------------------------------------------------------------------------------------------------------------------------------------------------------------------------------------------------------------------------------------------------------|----------------------------------------------------------------------------------------------------------------------------------------------------------------------------------------------------------------------------------------------------------------------------------------------------------------------------------------------------------------------------------------------------------------------------------------------------------------------------------------------------------------------------------------------------------------------------------------------------------------------------------------------------------------------------------------------------------------------------------------------------------------------------------------------------------------------------------------------------------------------------------------------------------------------------------------------------------------------------------------------------------------------------------------------------------------------------------------------------------------------------------------------------------------------------------------------------------------------------------------------------------------------------------------------------------------------------------------------------------------------------------------------------------------------------------------------------------------------------------------------------------|-------------------------------------------------------------------------------------------------------------------------------------------------------------------------------------------------------------------------------------------------------------------------------------------------------------------------------------------------------------------------------------------------------------------------------------------------------------------------------------------------------------------------------------------------------------------------------------------------------------------------------------------------------------------------------------------------------------------------------------------------------------------------------------------------------------------------------------------------------------------------------------------------------------------------------------------------------------------------------------------------------------------------------------------------------------------------------------------------------------------------------------------------------------------------------------------------------------------------------------------------------------------------------------------------------------------------------------------------------------------------------------------------------------------------------------------------------------------------------------------------------------------------------------------------------------------------------------------------------------------------------------------------|
| 1. (meal* adj3 replace*).mp.<br>2. (breakfast adj3 replace*).mp.<br>3. (lunch adj3 replace*).mp.<br>4. (dinner adj3 replace*).mp.<br>5. liquid supplement*.mp.<br>6. (formula adj2 diet*).mp.<br>7. or/ 1- 6<br>8. ogtt.mp.<br>9. hba1c.mp.<br>10. insulin*.mp.<br>11. glycemia.mp.<br>12. hyperinsulin*.mp.<br>13. dysglycemia.mp.<br>14. exp Hemoglobin A, Glycosylated/<br>15. exp Blood Glucose/<br>16. exp Hyperglycemia/<br>17. or/ 8-16<br>18. ldl.mp.<br>19. hdl.mp.<br>20. apo B.mp.<br>21. non hdl c.mp.<br>22. triglycerides.mp.<br>23. TG.mp.<br>24. triacylglycerol*.mp.<br>25. TAG.mp.<br>26. hypertriglyceridemia.mp.<br>27. exp Cholesterol, LDL/<br>28. exp Cholesterol, HDL/<br>29. exp Apolipoproteins B/<br>30. exp Triglycerides/<br>31. exp Hypertriglyceridemia/<br>32. exp Dyslipidemias/<br>33. or/18- 32<br>34. systolic blood pressure.mp.<br>35. diastolic blood pressure.mp.<br>36. hypertension.mp.<br>37. SBP.mp.<br>38. DBP.mp.<br>39. exp Hypertension/<br>40. exp Blood Pressure/<br>41. or/ 34- 40<br>42. waist circumference.mp.<br>43. body weight.mp.<br>44. body fat.mp.<br>45. body mass index.mp.<br>46. BMI.mp.<br>47. metabolic syndrome.mp.<br>48. exp Abdominal Fat/<br>49. exp Body Weight/<br>50. exp Body Mass Index/<br>51. or/ 42-50<br>52. exp Obesity/<br>53. exp Diabetes Mellitus, Type 2/<br>54. exp Metabolic Syndrome X/<br>55. or/ 52-54<br>56. 7 and (17 or 33 or 51 or 55)<br>57. limit 56 to animals<br>58. 56 not 57 | 1. (meal* adj3 replace*).mp.<br>2. (breakfast adj3 replace*).mp.<br>3. (lunch adj3 replace*).mp.<br>4. (dinner adj3 replace*).mp.<br>5. liquid supplement*.mp.<br>6. (formula adj2 diet*).mp.<br>7. or/ 1-6<br>8. ogtt.mp.<br>9. hba1c.mp.<br>10. insulin*.mp.<br>11. glycemia.mp.<br>12. hyperinsulin*.mp.<br>13. dysglycemia.mp.<br>14. exp hemoglobin A1c/<br>15. exp glucose blood level/<br>16. exp hyperglycemia/<br>17. or/8-16<br>18. ldl.mp.<br>19. hdl.mp.<br>20. apo B.mp.<br>21. non hdl c.mp.<br>22. triglycerides.mp.<br>23. TG.mp.<br>24. triacylglycerol*.mp.<br>25. TAG.mp.<br>26. hypertriglyceridemia.mp.<br>27. exp low density lipoprotein cholesterol/<br>28. exp high density lipoprotein cholesterol/<br>29. exp apolipoprotein B/<br>30. exp triacylglycerol/<br>31. exp hypertriglyceridemia/<br>32. exp dyslipidemia/<br>33. or/ 18-32<br>34. systolic blood pressure.mp.<br>35. diastolic blood pressure.mp.<br>36. hypertension.mp.<br>37. SBP.mp.<br>38. DBP.mp.<br>39. exp hypertension/<br>40. exp blood pressure/<br>41. or/34- 40<br>42. waist circumference.mp.<br>43. body weight.mp.<br>44. body fat.mp.<br>45. body mass index.mp.<br>46. BMI.mp.<br>47. metabolic syndrome.mp.<br>48. exp abdominal fat/<br>49. exp body weight/<br>50. exp body mass/<br>51. or/ 42-50<br>52. exp obesity/<br>53. exp diabetes mellitus/<br>54. exp metabolic syndrome X/<br>55. or/ 52-54<br>56. 7 and (17 or 33 or 41 or 51 or 55)<br>57. limit 56 to animals<br>58. 56 not 57 | 1. (meal* adj3 replace*).ti,ab,hw.<br>2. (breakfast adj3 replace*).ti,ab,hw.<br>3. (lunch adj3 replace*).ti,ab,hw.<br>4. (dinner adj3 replace*).ti,ab,hw.<br>5. liquid supplement*.ti,ab,hw.<br>6. (formula adj2 diet*).ti,ab,hw.<br>7. or/ 1- 6<br>8. ogtt.ti,ab,hw.<br>9. hba1c.ti,ab,hw.<br>10. insulin*.ti,ab,hw.<br>11. glycemia.ti,ab,hw.<br>12. hyperinsulin*.ti,ab,hw.<br>13. dysglycemia.ti,ab,hw.<br>14. exp Hemoglobin A, Glycosylated/<br>15. exp Blood Glucose/<br>16. exp Hyperglycemia/<br>17. or/ 8-16<br>18. ldl.ti,ab,hw.<br>19. hdl.ti,ab,hw.<br>20. apo B.ti,ab,hw.<br>21. non hdl c.ti,ab,hw.<br>22. triglycerides.ti,ab,hw.<br>23. TG.ti,ab,hw.<br>24. triacylglycerol.ti,ab,hw.<br>25. TAG.ti,ab,hw.<br>26. hypertriglyceridemia.ti,ab,hw.<br>27. exp Cholesterol, LDL/<br>28. exp Cholesterol, HDL/<br>29. exp Apolipoproteins B/<br>30. exp Triglycerides/<br>31. exp Hypertriglyceridemia/<br>32. exp Dyslipidemias/<br>33. or/ 18-32<br>34. systolic blood pressure.ti,ab,hw.<br>35. diastolic blood pressure.ti,ab,hw.<br>36. hypertension.ti,ab,hw.<br>37. SBP.ti,ab,hw.<br>38. DBP.ti,ab,hw.<br>39. exp Hypertension/<br>40. exp Blood Pressure/<br>41. or/34- 40<br>42. waist circumference.ti,ab,hw.<br>43. body weight.ti,ab,hw.<br>44. body fat.ti,ab,hw.<br>45. body mass index.ti,ab,hw.<br>46. BMI.ti,ab,hw.<br>47. metabolic syndrome.ti,ab,hw.<br>48. exp Abdominal Fat/<br>49. exp Body Weight/<br>50. exp Body Mass Index/<br>51. or/ 42-50<br>52. exp Obesity/<br>53. exp Diabetes Mellitus, Type 2/<br>54. exp Metabolic Syndrome X/<br>55. 52 or 53 or 54<br>56. 7 and (17 or 33 or 41 or 51 or 55) |

Original search date: September 12, 2016

Updates: August 15, 2017; January 22, 2018; March 22, 2018; May 31, 2018; December 10, 2018

# SUPPLEMENTARY DATA

**Supplementary Table 2.** Trial characteristics

| Study, Year [Reference]    | Participants               | Age, years  | BMI, kg/m <sup>2</sup> | HbA <sub>1c</sub> , % | Diabetes duration, years | Setting       | Design | Diet Description                                                                                                                      | Diet breakdown (%C: %F: %P)                  | Dose (%E) | Additional treatment characteristics                                                     | Dropout Rate, % | Follow-up duration | Funding source |
|----------------------------|----------------------------|-------------|------------------------|-----------------------|--------------------------|---------------|--------|---------------------------------------------------------------------------------------------------------------------------------------|----------------------------------------------|-----------|------------------------------------------------------------------------------------------|-----------------|--------------------|----------------|
| Yip et al., 2001 [19]      |                            |             |                        |                       |                          | OP, USA       | P      |                                                                                                                                       |                                              |           |                                                                                          |                 | 12 weeks           | A & I          |
| Intervention               | 41 OB + DM2                | 58.8 ± 8.7  | 32.6 ± 4.1             | 8.7 ± 1.3             | NR                       |               |        | 2 to 3 main meals replaced with MR shakes (sugar-containing and sugar-free) + portion-controlled dinner high in fruits and vegetables | 500 kcal/d deficit                           | ~29       | Individual consultation with registered dietitian at various timepoints throughout study | 18              |                    |                |
| Control                    | 16 OB + DM2                | 59.2 ± 7.7  | 33.8 ± 4.8             | 9.3 ± 1.5             | NR                       |               |        | ADA-based individualized food exchange diet plan                                                                                      | 500 kcal/d deficit (55-65: <30: 10-20)       |           | Individual consultation with registered dietitian at various timepoints throughout study | 36              |                    |                |
| Li et al., 2005 [20]       |                            |             |                        |                       |                          | OP, USA       | P      |                                                                                                                                       |                                              |           |                                                                                          |                 | 52 weeks           | I              |
| Intervention               | 46 OB + DM2 (27M, 19F)     | 54.4 ± 9.3  | 32.8 ± 3.7             | 7.6 ± 1.4             | NR                       |               |        | 1 to 2 main meals were replaced with MR shakes + fruits and vegetables + 1 to 2 sensible meals                                        | 500 kcal/d deficit                           | ~11-23    |                                                                                          | 19              |                    |                |
| Control                    | 36 OB + DM2 (24M, 12F)     | 56.6 ± 10.4 | 33.7 ± 3.6             | 7.5 ± 1.7             | NR                       |               |        | ADA-based food exchanges                                                                                                              | 500 kcal/d deficit (55-65: <30: 10-20)       |           |                                                                                          | 33              |                    |                |
| Cheskin et al., 2008 [21]  |                            |             |                        |                       |                          | OP, USA       | P      |                                                                                                                                       |                                              | ~20       |                                                                                          |                 | 34 weeks           | I              |
| Intervention               | 54 OW/OB + DM2 (25M, 29F)  | 54.6 ± 7.0  | 35.3 ± 3.5             | 7.7 ± 0.2             | NR                       |               |        | 50-60%E came from MR shakes, soups, and bars                                                                                          | 25% energy deficit (45-50: 25-30: 15-25)     |           | Attended group educational classes on nutrition, exercise and diabetes                   | 43              |                    |                |
| Control                    | 58 OW/OB + DM2 (24M, 34F)  | 55.5 ± 7.2  | 35.7 ± 3.8             | 7.1 ± 0.2             | NR                       |               |        | ADA-based food exchange lists                                                                                                         | 25% energy deficit (45-50: 25-30: 15-25)     |           | Attended group educational classes on nutrition, exercise and diabetes                   | 71              |                    |                |
| Sun et al., 2008 [22]      |                            |             |                        |                       |                          | OP, China     | P      |                                                                                                                                       |                                              |           |                                                                                          |                 | 24 weeks           | I              |
| Intervention               | 100 OW + DM2 (74M, 26F)    | 51.0 ± 10.0 | 26.6 ± 3.0             | 7.1 ± 1.0             | 4.0 ± 3.0                |               |        | Replaced breakfast with MR shake                                                                                                      | ~1600 kcal/d                                 | ~13       | Received blood glucose monitors and group diabetes education                             | 3               |                    |                |
| Control                    | 50 OW + DM2 (34M, 16F)     | 51.0 ± 7.0  | 27.2 ± 2.1             | 7.0 ± 1.4             | 4.0 ± 2.8                |               |        | ADA- and CDA-based exchange diet plan                                                                                                 | ~1600 kcal/d                                 |           | Received diabetes education including diet and physical activity instruction             | 2               |                    |                |
| Keogh & Clifton, 2012 [23] |                            |             |                        |                       |                          | OP, Australia | P      |                                                                                                                                       |                                              |           |                                                                                          |                 | 24 weeks           | NR             |
| Intervention               | 43 OW/OB (27M, 16F)        |             |                        |                       | NR                       |               |        | 2 main meals were replaced with MR shakes + low fat evening meal + at least 5 servings of fruit and vegetables                        | ~1200 kcal/d                                 | ~35       |                                                                                          | 28              |                    |                |
| Control                    | 38 OW/OB (23M, 15F)        | 61.7        | 33.7                   | 6.8                   | NR                       |               |        | CSIRO Total Wellbeing Diet book                                                                                                       |                                              |           |                                                                                          | 31              |                    |                |
| Shirai et al., 2013 [24]   |                            |             |                        |                       |                          | OP, Japan     | P      |                                                                                                                                       |                                              |           |                                                                                          |                 | 24 weeks           | A              |
| Intervention               | 119 OW/OB + DM2 (45M, 74F) | 50.5 ± 11.8 | 30.8 ± 5.8             | 7.7 ± 1.4             | NR                       |               |        | Breakfast was replaced with LMR + 2 conventional Japanese low-caloric meals                                                           | 20 kcal/kg x standard body weight (52:30:18) | ~15       |                                                                                          | 1               |                    |                |
| Control                    | 110 OW/OB + DM2 (40M, 70F) | 51.7 ± 10.9 | 30.0 ± 4.6             | 7.7 ± 1.3             | NR                       |               |        | Classical Japanese low-caloric meals 3 times per day                                                                                  | 20 kcal/kg x standard body weight (60:25:15) |           |                                                                                          | 8               |                    |                |

## SUPPLEMENTARY DATA

| Study, Year<br>[Reference]    | Participants                     | Age,<br>years                      | BMI,<br>kg/m <sup>2</sup>                                                   | HbA <sub>1c</sub> , %                                                              | Diabetes<br>duration,<br>years                                           | Setting            | Design | Diet Description                                                                                                  | Diet<br>breakdown<br>(C: F: P) | Dose<br>(%E) | Additional treatment<br>characteristics                                                                                                                                                     | Dropout<br>Rate, % | Follow-<br>up, wks | Funding |
|-------------------------------|----------------------------------|------------------------------------|-----------------------------------------------------------------------------|------------------------------------------------------------------------------------|--------------------------------------------------------------------------|--------------------|--------|-------------------------------------------------------------------------------------------------------------------|--------------------------------|--------------|---------------------------------------------------------------------------------------------------------------------------------------------------------------------------------------------|--------------------|--------------------|---------|
| Stenvers et al.,<br>2014 [25] |                                  |                                    |                                                                             |                                                                                    |                                                                          | OP,<br>Netherlands | C      |                                                                                                                   |                                |              |                                                                                                                                                                                             |                    | 12 weeks           | I       |
| Intervention                  | 20 OW/OB<br>+ DM2<br>(10M, 10F)  | 60.0 ±<br>7.0                      | Median<br>(25 <sup>th</sup> -75 <sup>th</sup><br>percentile),<br>30 (27-35) | Median<br>(25 <sup>th</sup> -75 <sup>th</sup><br>percentile),<br>6.5 (6.1-<br>6.8) | Median<br>(25 <sup>th</sup> -75 <sup>th</sup><br>percentile),<br>5 (1-9) |                    |        | Breakfast was replaced with MR<br>shake + self-selected conventional<br>foods                                     | 41: 32: 33<br>(1659<br>kcal/d) | ~18%         |                                                                                                                                                                                             | 16                 |                    |         |
| Control                       |                                  |                                    |                                                                             |                                                                                    |                                                                          |                    |        | Free-choice control breakfast + self-<br>selected conventional foods                                              | 43: 27: 30<br>(1737<br>kcal/d) |              |                                                                                                                                                                                             | 20                 |                    |         |
| Chee et al.,<br>2017 [26]     |                                  |                                    |                                                                             |                                                                                    |                                                                          | OP,<br>Malaysia    | P      |                                                                                                                   |                                |              |                                                                                                                                                                                             |                    | 24 weeks           | I       |
| Intervention 1<br>(tDNA-MI)   | 58 OW/OB<br>+ DM2<br>(19M, 39F)  | 55.0 ±<br>8.0<br>(median<br>± IQR) | 30.7 ± 8.2<br>(median ±<br>IQR)                                             | 7.7 ± 1.1<br>(median ±<br>IQR)                                                     | NR                                                                       |                    |        | 1 to 2 main meals replaced with MR<br>shakes + self-selected conventional<br>low-calorie foods                    | 1200 or<br>1500 kcal/d         | ~31-63       | Received counselling incorporating<br>motivational interviewing +<br>prescription of 150 mins/wk of<br>physical activity                                                                    | 12                 |                    |         |
| Intervention 2<br>(tDNA-CC)   | 57 OW/OB<br>+ DM2 (7M,<br>50F)   | 55.0 ±<br>8.0<br>(median<br>± IQR) | 29.4 ± 7.3<br>(median ±<br>IQR)                                             | 7.7 ± 1.4<br>(median ±<br>IQR)                                                     | NR                                                                       |                    |        | 1 to 2 main meals replaced with MR<br>shakes + self-selected conventional<br>low-calorie foods                    | 1200 or<br>1500 kcal/d         | ~31-63       | Received counselling incorporating<br>conventional techniques (i.e.<br>empathetic listening, encouragement)<br>+ prescription of 150 mins/wk of<br>physical activity                        | 30                 |                    |         |
| Control (UC)                  | 105 OW/OB<br>+ DM2<br>(59M, 56F) | 54.0 ±<br>8.0<br>(median<br>± IQR) | 28.9 ± 6.3<br>(median ±<br>IQR)                                             | 7.9 ± 1.3<br>(median ±<br>IQR)                                                     | NR                                                                       |                    |        | Low-calorie diet of self-selected<br>conventional foods based on the<br>Malaysian Clinical Practice<br>Guidelines | 1200 or<br>1500 kcal/d         |              | Followed Malaysian Clinical Practice<br>Guidelines for DM2 (includes<br>recommendation of 150 mins/wk of<br>physical activity) with standard<br>diabetes support and lifestyle<br>education | 15                 |                    |         |

Date represents mean ± SD, unless stated otherwise. tDNA, trans-cultural diabetes-specific nutrition algorithm; MI, motivational interviewing; CC, conventional counselling; UC, usual care; OW, overweight; OB, obese; DM2, type 2 diabetes; M, male; F, female; NR, not reported; OP, outpatient; P, parallel; C, crossover; MR, meal replacement; LMR, liquid meal replacement; ADA, American Diabetes Association; CDA, Chinese Diabetes Association; CSIRO, Commonwealth Scientific and Industrial Research Organization; C: F: P, carbohydrates: fat: protein; kcal/d, calories per day; %E, % of total daily caloric intake; A, agency; I, industry;

# SUPPLEMENTARY DATA

**Supplementary Table 3.** Select sensitivity analyses in which the systematic removal of an individual trial altered the significance of the effect estimate or the evidence for heterogeneity

| Removal of                           | Intervention, N | Control, N | Pooled effect estimate |                |         | Heterogeneity  |                |
|--------------------------------------|-----------------|------------|------------------------|----------------|---------|----------------|----------------|
|                                      |                 |            | MD                     | 95% CI         | P-value | I <sup>2</sup> | P <sub>Q</sub> |
| <i>Body fat, %</i>                   |                 |            |                        |                |         |                |                |
| Chee et al. 2017 – CC vs. UC         | 57              | 57         | -1.49                  | [-2.16, -0.83] | <0.001  | 63%            | 0.07           |
| Chee et al. 2017 – MI vs. UC         | 58              | 58         | -1.61                  | [-2.37, -0.84] | <0.001  | 67%            | 0.05           |
| <i>Waist circumference, cm</i>       |                 |            |                        |                |         |                |                |
| Sun et al. 2008                      | 100             | 50         | -1.79                  | [-3.57, -0.01] | 0.05    | 69%            | 0.02           |
| Chee et al. 2017 – MI vs. UC         | 58              | 58         | -1.87                  | [-3.74, 0.00]  | 0.05    | 79%            | 0.002          |
| Stenvers et al. 2014                 | 20              | 20         | -3.17                  | [-3.87, -2.46] | <0.001  | 0%             | 0.43           |
| <i>Fasting insulin, pmol/L</i>       |                 |            |                        |                |         |                |                |
| Li et al. 2005                       | 46              | 36         | -12.01                 | [-25.35, 1.32] | 0.08    | 37%            | 0.18           |
| Sun et al. 2008                      | 100             | 50         | -10.06                 | [-22.99, 2.86] | 0.13    | 32%            | 0.21           |
| Cheskin et al. 2008                  | 31              | 17         | -8.16                  | [-19.18, 2.87] | 0.15    | 0%             | 0.43           |
| Shirai et al. 2013                   | 119             | 110        | -10.21                 | [-24.81, 4.39] | 0.17    | 35%            | 0.19           |
| <i>LDL-c, mmol/L</i>                 |                 |            |                        |                |         |                |                |
| Li et al. 2005                       | 46              | 36         | 0.06                   | [-0.03, 0.15]  | 0.18    | 37%            | 0.14           |
| <i>HDL-c, mmol/L</i>                 |                 |            |                        |                |         |                |                |
| Sun et al. 2008                      | 100             | 50         | 0.02                   | [-0.02, 0.05]  | 0.42    | 47%            | 0.07           |
| <i>Triglycerides, mmol/L</i>         |                 |            |                        |                |         |                |                |
| Stenvers et al. 2014                 | 20              | 20         | -0.08                  | [-0.20, 0.04]  | 0.17    | 37%            | 0.13           |
| <i>Systolic blood pressure, mmHg</i> |                 |            |                        |                |         |                |                |
| Keogh & Clifton, 2012                | 41              | 36         | -6.03                  | [-7.63, -4.43] | <0.001  | 0%             | 0.61           |

MD, mean difference; CC, conventional counselling; MI, motivational interviewing; UC, usual care.

# SUPPLEMENTARY DATA

**Supplementary Table 4.** Sensitivity analyses of pooled effect estimates in which trials of <24 weeks in duration were removed

| Outcome                        | Pooled effect estimate of all included trials |         | Pooled effect estimates after removal of trials <24 weeks in duration |         | % change in pooled effect estimate |
|--------------------------------|-----------------------------------------------|---------|-----------------------------------------------------------------------|---------|------------------------------------|
|                                | Mean difference [95% CI]                      | P-value | Mean difference [95% CI]                                              | P-value |                                    |
| Body weight, kg                | -2.37 [-3.30, -1.44]                          | <0.001  | -2.74 [-3.87, -1.62]                                                  | <0.001  | -16%                               |
| BMI, kg/m <sup>2</sup>         | -0.87 [-1.31, -0.42]                          | <0.001  | -1.12 [-1.68, -0.57]                                                  | <0.001  | -29%                               |
| Body fat, %                    | -1.66 [-2.17, -1.15]                          | <0.001  | -1.72 [-2.24, -1.21]                                                  | <0.001  | -4%                                |
| Waist circumference, cm        | -2.24 [-3.72, -0.77]                          | 0.003   | -3.17 [-3.87, -2.46]                                                  | <0.001  | -42%                               |
| HbA <sub>1c</sub> , %          | -0.43 [-0.66, -0.19]                          | <0.001  | -0.52 [-0.78, -0.26]                                                  | <0.001  | -21%                               |
| Fasting glucose, mmol/l        | -0.63 [-0.99, -0.27]                          | <0.001  | -0.56 [-0.94, -0.17]                                                  | 0.005   | +11%                               |
| Fasting insulin, pmol/l        | -11.83 [-23.11, -0.54]                        | 0.04    | -19.41 [-31.13, -7.69]                                                | 0.001   | -64%                               |
| LDL-c, mmol/l                  | 0.02 [-0.10, 0.14]                            | 0.78    | 0.03 [-0.12, 0.17]                                                    | 0.72    | -50%                               |
| HDL-c, mmol/l                  | 0.00 [-0.05, 0.04]                            | 0.93    | -0.01 [-0.06, 0.05]                                                   | 0.73    | -100%                              |
| Non-HDL-c, mmol/l              | -0.02 [-0.11, 0.07]                           | 0.69    | -0.01 [-0.12, 0.10]                                                   | 0.83    | +50%                               |
| Triglycerides, mmol/l          | -0.01 [-0.17, 0.14]                           | 0.86    | -0.07 [-0.22, 0.07]                                                   | 0.33    | -600%                              |
| Systolic blood pressure, mmHg  | -4.97 [-7.32, -2.62]                          | <0.001  | -5.00 [-7.53, -2.48]                                                  | <0.001  | -1%                                |
| Diastolic blood pressure, mmHg | -1.98 [-3.05, -0.91]                          | <0.001  | -2.09 [-3.28, -0.89]                                                  | <0.001  | -6%                                |

# SUPPLEMENTARY DATA

**Supplementary Table 5.** Sensitivity analyses of heterogeneity in which trials of <24 weeks in duration were removed

| Outcome                        | Heterogeneity of all included trials |                | Heterogeneity after removal of trials <24 weeks in duration |                |
|--------------------------------|--------------------------------------|----------------|-------------------------------------------------------------|----------------|
|                                | I <sup>2</sup>                       | P <sub>Q</sub> | I <sup>2</sup>                                              | P <sub>Q</sub> |
| Body weight, kg                | 84%                                  | <0.001         | 87%                                                         | <0.001         |
| BMI, kg/m <sup>2</sup>         | 89%                                  | <0.001         | 91%                                                         | <0.001         |
| Body fat, %                    | 50%                                  | 0.11           | 23%                                                         | 0.27           |
| Waist circumference, cm        | 74%                                  | 0.004          | 0%                                                          | 0.43           |
| HbA <sub>1c</sub> , %          | 87%                                  | <0.001         | 88%                                                         | <0.001         |
| Fasting glucose, mmol/l        | 70%                                  | <0.001         | 64%                                                         | 0.01           |
| Fasting insulin, pmol/l        | 22%                                  | 0.27           | 0%                                                          | 0.74           |
| LDL-c, mmol/l                  | 68%                                  | 0.001          | 75%                                                         | <0.001         |
| HDL-c, mmol/l                  | 71%                                  | <0.001         | 78%                                                         | <0.001         |
| Non-HDL-c, mmol/l              | 29%                                  | 0.19           | 46%                                                         | 0.08           |
| Triglycerides, mmol/l          | 68%                                  | 0.002          | 46%                                                         | 0.09           |
| Systolic blood pressure, mmHg  | 53%                                  | 0.05           | 61%                                                         | 0.03           |
| Diastolic blood pressure, mmHg | 15%                                  | 0.32           | 27%                                                         | 0.24           |

# SUPPLEMENTARY DATA

**Supplementary Table 6.** Sensitivity analyses of pooled effect estimates in which trials using non-diabetes-specific liquid meal replacements were removed

| Outcome                        | Pooled effect estimate of all included trials |         | Pooled effect estimates after removal of trials using non-diabetes-specific liquid meal replacements |         | % change in pooled effect estimate |
|--------------------------------|-----------------------------------------------|---------|------------------------------------------------------------------------------------------------------|---------|------------------------------------|
|                                | Mean difference [95% CI]                      | P-value | Mean difference [95% CI]                                                                             | P-value |                                    |
| Body weight, kg                | -2.37 [-3.30, -1.44]                          | <0.001  | -2.97 [-4.88, -1.05]                                                                                 | 0.002   | -25%                               |
| BMI, kg/m <sup>2</sup>         | -0.87 [-1.31, -0.42]                          | <0.001  | -1.10 [-1.90, -0.30]                                                                                 | 0.007   | -26%                               |
| Body fat, %                    | -1.66 [-2.17, -1.15]                          | <0.001  | NA                                                                                                   | NA      | NA                                 |
| Waist circumference, cm        | -2.24 [-3.72, -0.77]                          | 0.003   | NA                                                                                                   | NA      | NA                                 |
| HbA <sub>1c</sub> , %          | -0.43 [-0.66, -0.19]                          | <0.001  | -0.53 [-0.92, -0.14]                                                                                 | 0.007   | -23%                               |
| Fasting glucose, mmol/l        | -0.63 [-0.99, -0.27]                          | <0.001  | -0.76 [-1.15, -0.37]                                                                                 | <0.001  | -21%                               |
| Fasting insulin, pmol/l        | -11.83 [-23.11, -0.54]                        | 0.04    | -14.82 [-37.48, 7.83]                                                                                | 0.20    | -25%                               |
| LDL-c, mmol/l                  | 0.02 [-0.10, 0.14]                            | 0.78    | 0.07 [-0.06, 0.20]                                                                                   | 0.28    | +250%                              |
| HDL-c, mmol/l                  | 0.00 [-0.05, 0.04]                            | 0.93    | -0.04 [-0.08, 0.00]                                                                                  | 0.06    | -400%                              |
| Non-HDL-c, mmol/l              | -0.02 [-0.11, 0.07]                           | 0.69    | 0.05 [-0.05, 0.16]                                                                                   | 0.33    | +350%                              |
| Triglycerides, mmol/l          | -0.01 [-0.17, 0.14]                           | 0.86    | 0.05 [-0.20, 0.31]                                                                                   | 0.68    | +600%                              |
| Systolic blood pressure, mmHg  | -4.97 [-7.32, -2.62]                          | <0.001  | -6.57 [-8.49, -4.65]                                                                                 | <0.001  | -32%                               |
| Diastolic blood pressure, mmHg | -1.98 [-3.05, -0.91]                          | <0.001  | -2.60 [-3.85, -1.35]                                                                                 | <0.001  | -31%                               |

# SUPPLEMENTARY DATA

**Supplementary Table 7.** Sensitivity analyses of heterogeneity in which trials using non-diabetes-specific liquid meal replacements were removed

| Outcome                        | Heterogeneity of all included trials |                | Heterogeneity after removal of trials using non-diabetes-specific liquid meal replacements |                |
|--------------------------------|--------------------------------------|----------------|--------------------------------------------------------------------------------------------|----------------|
|                                | I <sup>2</sup>                       | P <sub>Q</sub> | I <sup>2</sup>                                                                             | P <sub>Q</sub> |
| Body weight, kg                | 84%                                  | <0.001         | 91%                                                                                        | <0.001         |
| BMI, kg/m <sup>2</sup>         | 89%                                  | <0.001         | 93%                                                                                        | <0.001         |
| Body fat, %                    | 50%                                  | 0.11           | NA                                                                                         | NA             |
| Waist circumference, cm        | 74%                                  | 0.004          | NA                                                                                         | NA             |
| HbA <sub>1c</sub> , %          | 87%                                  | <0.001         | 91%                                                                                        | <0.001         |
| Fasting glucose, mmol/l        | 70%                                  | <0.001         | 51%                                                                                        | 0.09           |
| Fasting insulin, pmol/l        | 22%                                  | 0.27           | 54%                                                                                        | 0.11           |
| LDL-c, mmol/l                  | 68%                                  | 0.001          | 56%                                                                                        | 0.06           |
| HDL-c, mmol/l                  | 71%                                  | <0.001         | 37%                                                                                        | 0.18           |
| Non-HDL-c, mmol/l              | 29%                                  | 0.19           | 0%                                                                                         | 0.92           |
| Triglycerides, mmol/l          | 68%                                  | 0.002          | 72%                                                                                        | 0.006          |
| Systolic blood pressure, mmHg  | 53%                                  | 0.05           | 0%                                                                                         | 0.62           |
| Diastolic blood pressure, mmHg | 15%                                  | 0.32           | 3%                                                                                         | 0.39           |



## SUPPLEMENTARY DATA

**Supplementary Table 8.** GRADE certainty of evidence assessment

| Outcome                | № of studies | Study design      | Risk of bias | Certainty assessment*       |              |                             |                        | Effect<br>MD [95% CI]*** | Certainty     |
|------------------------|--------------|-------------------|--------------|-----------------------------|--------------|-----------------------------|------------------------|--------------------------|---------------|
|                        |              |                   |              | Inconsistency               | Indirectness | Imprecision                 | Other considerations** |                          |               |
| Body weight, kg        | 9            | randomised trials | not serious  | <u>serious</u> <sup>a</sup> | not serious  | not serious                 | none                   | -2.37 [-3.30, -1.44]     | ⊕⊕⊕○ MODERATE |
| BMI, kg/m <sup>2</sup> | 8            | randomised trials | not serious  | <u>serious</u> <sup>b</sup> | not serious  | not serious                 | none                   | -0.87 [-1.31, -0.42]     | ⊕⊕⊕○ MODERATE |
| Body fat, %            | 4            | randomised trials | not serious  | not serious                 | not serious  | <u>serious</u> <sup>c</sup> | none                   | -1.66 [-2.17, -1.15]     | ⊕⊕⊕○ MODERATE |
| WC, cm                 | 5            | randomised trials | not serious  | <u>serious</u> <sup>d</sup> | not serious  | <u>serious</u> <sup>e</sup> | none                   | -2.24 [-3.72, -0.77]     | ⊕⊕○○ LOW      |
| HbA <sub>1c</sub> , %  | 9            | randomised trials | not serious  | <u>serious</u> <sup>f</sup> | not serious  | <u>serious</u> <sup>g</sup> | none                   | -0.43 [-0.66, -0.19]     | ⊕⊕○○ LOW      |
| FG, mmol/l             | 9            | randomised trials | not serious  | <u>serious</u> <sup>h</sup> | not serious  | <u>serious</u> <sup>i</sup> | none                   | -0.63 [-0.99, -0.27]     | ⊕⊕○○ LOW      |
| FI, pmol/l             | 9            | randomised trials | not serious  | not serious                 | not serious  | <u>serious</u> <sup>j</sup> | none                   | -11.83 [-23.11, -0.54]   | ⊕⊕⊕○ MODERATE |
| LDL-c, mmol/l          | 9            | randomised trials | not serious  | <u>serious</u> <sup>k</sup> | not serious  | <u>serious</u> <sup>l</sup> | none                   | 0.02 [-0.10, 0.14]       | ⊕⊕○○ LOW      |

# SUPPLEMENTARY DATA

| Outcome           | № of studies | Study design      | Risk of bias | Certainty assessment*       |              |                             |                        | Effect<br>MD [95% CI]*** | Certainty     |
|-------------------|--------------|-------------------|--------------|-----------------------------|--------------|-----------------------------|------------------------|--------------------------|---------------|
|                   |              |                   |              | Inconsistency               | Indirectness | Imprecision                 | Other considerations** |                          |               |
| HDL-c, mmol/l     | 9            | randomised trials | not serious  | <u>serious</u> <sup>m</sup> | not serious  | <u>serious</u> <sup>n</sup> | none                   | 0.00 [-0.05, 0.04]       | ⊕⊕○○ LOW      |
| Non-HDL-c, mmol/l | 9            | randomised trials | not serious  | not serious                 | not serious  | <u>serious</u> <sup>o</sup> | none                   | -0.02 [-0.11, 0.07]      | ⊕⊕⊕○ MODERATE |
| TG, mmol/l        | 9            | randomised trials | not serious  | <u>serious</u> <sup>p</sup> | not serious  | <u>serious</u> <sup>q</sup> | none                   | -0.01 [-0.17, 0.14]      | ⊕⊕○○ LOW      |
| SBP, mmHg         | 7            | randomised trials | not serious  | <u>serious</u> <sup>r</sup> | not serious  | not serious                 | none                   | -4.97 [-7.32, -2.62]     | ⊕⊕⊕○ MODERATE |
| DBP, mmHg         | 7            | randomised trials | not serious  | not serious                 | not serious  | <u>serious</u> <sup>s</sup> | none                   | -1.98 [-3.05, -0.91]     | ⊕⊕⊕○ MODERATE |

BMI, body mass index; WC, waist circumference; FG, fasting glucose; FI, fasting insulin; TG, triglycerides; SBP, systolic blood pressure; DBP, diastolic blood pressure; MD, mean difference

\*Since all included studies were randomized controlled trials, the certainty of the evidence was graded as high for all outcomes by default and then downgraded based on pre-specified criteria. Risk of bias – downgraded if the majority of studies were considered to be at high risk of bias. Inconsistency – downgraded if there was substantial unexplained heterogeneity ( $I^2 > 50\%$ ,  $P_Q < 0.1$ ) that was unexplained by any *a priori* sensitivity or subgroup analyses. Indirectness – downgraded if there were factors present relating to the participants, interventions, or outcomes that limited the generalizability of the results. Imprecision – downgraded if the 95% confidence interval (95% CI) crossed the minimally important difference (MID) for benefit or harm. MIDs used for each outcome were: 0.5 kg for body weight, 0.2 kg/m<sup>2</sup> for BMI, 2% for body fat, 2 cm for waist circumference, 0.3% for HbA<sub>1c</sub>, 0.5 mmol/l for fasting glucose, 5 pmol/l for fasting insulin, 0.1 mmol/l for all blood lipids and 2 mmHg for systolic and diastolic blood pressure.

\*\*Not able to assess publication bias for any of the outcomes as <10 trials were available

\*\*\*Random-effects model was used to pool data for body weight, BMI, waist circumference, HbA<sub>1c</sub>, fasting glucose, fasting insulin, LDL-c, HDL-c, non-HDL-c, TG, SBP and DBP. Fixed-effects model was used to pool data for body fat.

<sup>a</sup> Serious inconsistency for the effect of liquid meal replacements on body weight, as  $I^2 = 84\%$ ,  $P_Q < 0.001$

<sup>b</sup> Serious inconsistency for the effect of liquid meal replacements on BMI, as  $I^2 = 89\%$ ,  $P_Q < 0.001$

## SUPPLEMENTARY DATA

<sup>c</sup> Serious imprecision for the effect of liquid meal replacements on body fat, as the 95% CIs (-2.17% to -1.15%) overlap the minimally important difference for clinical benefit (2%)

<sup>d</sup> Serious inconsistency for the effect of liquid meal replacements on waist circumference, as  $I^2=74\%$ ,  $P_Q=0.004$

<sup>e</sup> Serious imprecision for the effect of liquid meal replacements on waist circumference, as the 95% CIs (-3.72 cm to -0.77 cm) overlap the minimally important difference for clinical benefit (2 cm)

<sup>f</sup> Serious inconsistency for the effect of liquid meal replacements on HbA<sub>1c</sub>, as  $I^2=87\%$ ,  $P_Q<0.001$

<sup>g</sup> Serious imprecision for the effect of liquid meal replacements on HbA<sub>1c</sub>, as the 95% CIs (-0.66% to -0.19%) overlap the minimally important difference for clinical benefit (0.3%)

<sup>h</sup> Serious inconsistency for the effect of liquid meal replacements on fasting glucose, as  $I^2=70\%$ ,  $P_Q<0.001$

<sup>i</sup> Serious imprecision for the effect of liquid meal replacements on fasting glucose, as the 95% CIs (-0.99 mmol/l to -0.27 mmol/l) overlap the minimally important difference for clinical benefit (0.5 mmol/l)

<sup>j</sup> Serious imprecision for the effect of liquid meal replacements on fasting insulin, as the 95% CIs (-23.11 pmol/l to -0.54 pmol/l) overlap the minimally important difference for clinical benefit (5 pmol/l)

<sup>k</sup> Serious inconsistency for the effect of liquid meal replacements on LDL-c, as  $I^2=68\%$ ,  $P_Q=0.001$

<sup>l</sup> Serious imprecision for the effect of liquid meal replacements on LDL-c, as the 95% CIs (-0.10 mmol/l to 0.14 mmol/l) overlap the minimally important difference for clinical benefit (0.1 mmol/l)

<sup>m</sup> Serious inconsistency for the effect of liquid meal replacements on HDL-c, as  $I^2=71\%$ ,  $P_Q<0.001$

<sup>n</sup> Serious imprecision for the effect of liquid meal replacements on HDL-c, as the 95% CIs (-0.05 mmol/l to 0.04 mmol/l) fall below the minimally important difference for clinical benefit (0.1 mmol/l)

<sup>o</sup> Serious imprecision for the effect of liquid meal replacements on non-HDL-c, as the 95% CIs (-0.11 mmol/l to 0.07 mmol/l) overlap the minimally important difference for clinical benefit (0.1 mmol/l)

<sup>p</sup> Serious inconsistency for the effect of liquid meal replacements on triglycerides,  $I^2=68\%$ ,  $P=0.002$

<sup>q</sup> Serious imprecision for the effect of liquid meal replacements on triglycerides, as the 95% CIs (-0.17 mmol/l to 0.14 mmol/l) overlap the minimally important difference for clinical benefit (0.1 mmol/l)

<sup>r</sup> Serious inconsistency for the effect of liquid meal replacements on systolic blood pressure,  $I^2=53\%$ ,  $P=0.05$

<sup>s</sup> Serious imprecision for the effect of liquid meal replacements on diastolic blood pressure, as the 95% CIs (-3.05 mmHg to -0.91 mmHg) overlap the minimally important difference for clinical benefit (2 mmHg)

# SUPPLEMENTARY DATA

**Supplemental Figure 1.** Cochrane risk of bias summary for all included trials

|                              | Random sequence generation (selection bias) | Allocation concealment (selection bias) | Blinding of participants and personnel (performance bias) | Blinding of outcome assessment (detection bias) | Incomplete outcome data (attrition bias) | Selective reporting (reporting bias) |
|------------------------------|---------------------------------------------|-----------------------------------------|-----------------------------------------------------------|-------------------------------------------------|------------------------------------------|--------------------------------------|
| Chee et al. 2017 - CC vs. UC | +                                           | ?                                       | ?                                                         | ?                                               | +                                        | ?                                    |
| Chee et al. 2017 - MI vs. UC | +                                           | ?                                       | ?                                                         | ?                                               | +                                        | ?                                    |
| Cheskin et al. 2008          | +                                           | ?                                       | ?                                                         | ?                                               | +                                        | +                                    |
| Keogh & Clifton, 2012        | +                                           | ?                                       | ?                                                         | +                                               | +                                        | +                                    |
| Li et al. 2005               | +                                           | ?                                       | ?                                                         | ?                                               | +                                        | +                                    |
| Shirai et al. 2013           | ?                                           | ?                                       | ?                                                         | ?                                               | ?                                        | +                                    |
| Stenvers et al. 2014         | ?                                           | +                                       | ?                                                         | ?                                               | +                                        | +                                    |
| Sun et al. 2008              | ?                                           | ?                                       | ?                                                         | ?                                               | +                                        | +                                    |
| Yip et al. 2001              | +                                           | ?                                       | ?                                                         | ?                                               | ?                                        | +                                    |

## SUPPLEMENTARY DATA

**Supplemental Figure 2.** Risk of bias proportion for all included trials

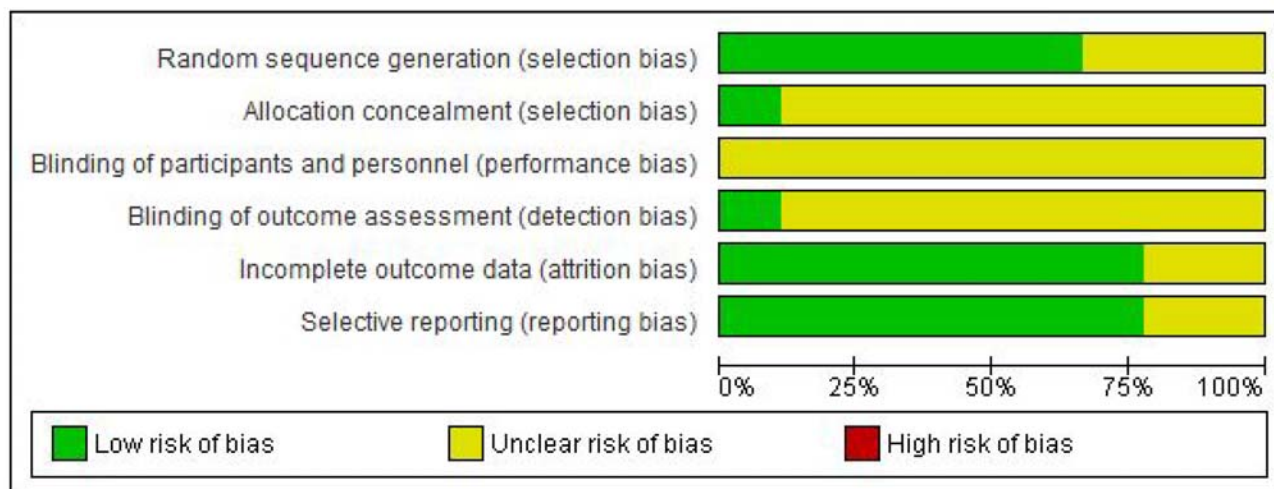

## SUPPLEMENTARY DATA

**Supplementary Figure 3.** Forest plot of the effect of liquid meal replacements as part of a weight loss diet (intervention) compared with traditional low-calorie weight loss diets (comparator) on body weight. Pooled effect estimates for the overall effect is represented by the diamond. Data are expressed as mean differences (MDs) with 95% confidence intervals (CIs), using the generic inverse variance method with random-effects models. Paired analyses were applied to all crossover trials. Interstudy heterogeneity was tested by the Cochran Q-statistic at a significance level of  $P_Q < 0.10$  and quantified by  $I^2$ . CC, conventional counselling; MI, motivational interviewing; UC, usual care.

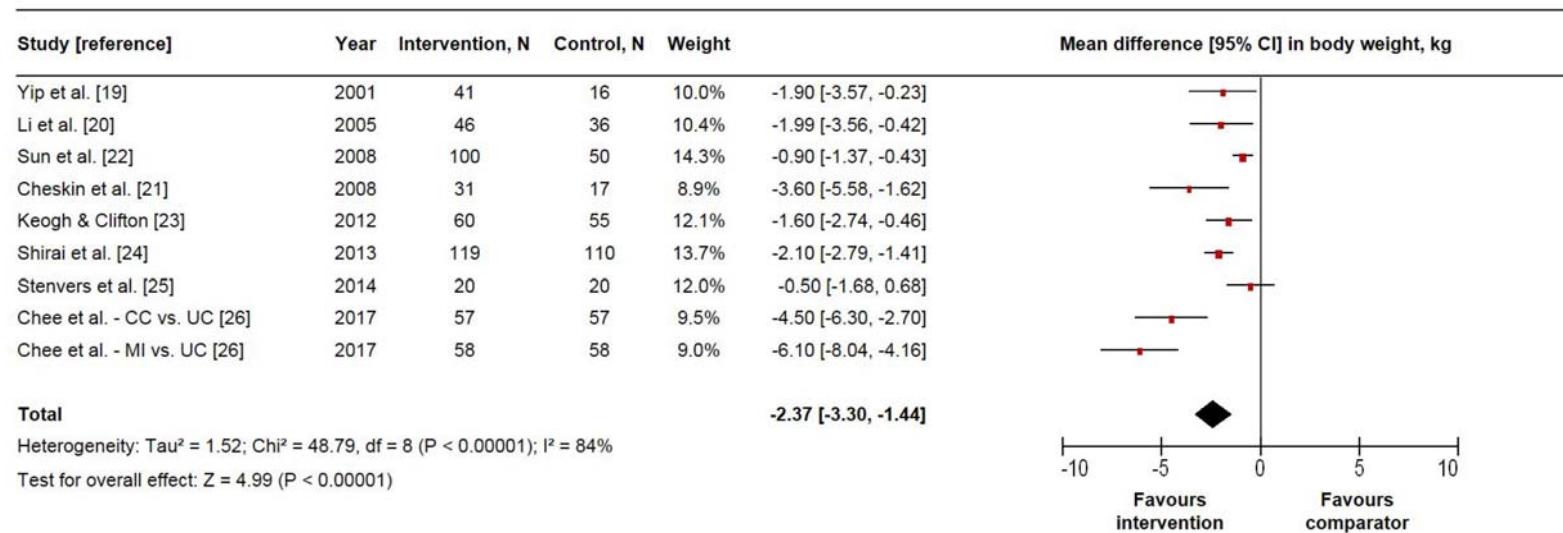

## SUPPLEMENTARY DATA

**Supplementary Figure 4.** Forest plot of the effect of liquid meal replacements as part of a weight loss diet (intervention) compared with traditional low-calorie weight loss diets (comparator) on BMI. Pooled effect estimates for the overall effect is represented by the diamond. Data are expressed as mean differences (MDs) with 95% confidence intervals (CIs), using the generic inverse variance method with random-effects models. Paired analyses were applied to all crossover trials. Interstudy heterogeneity was tested by the Cochran Q-statistic at a significance level of  $P_Q < 0.10$  and quantified by  $I^2$ . CC, conventional counselling; MI, motivational interviewing; UC, usual care.

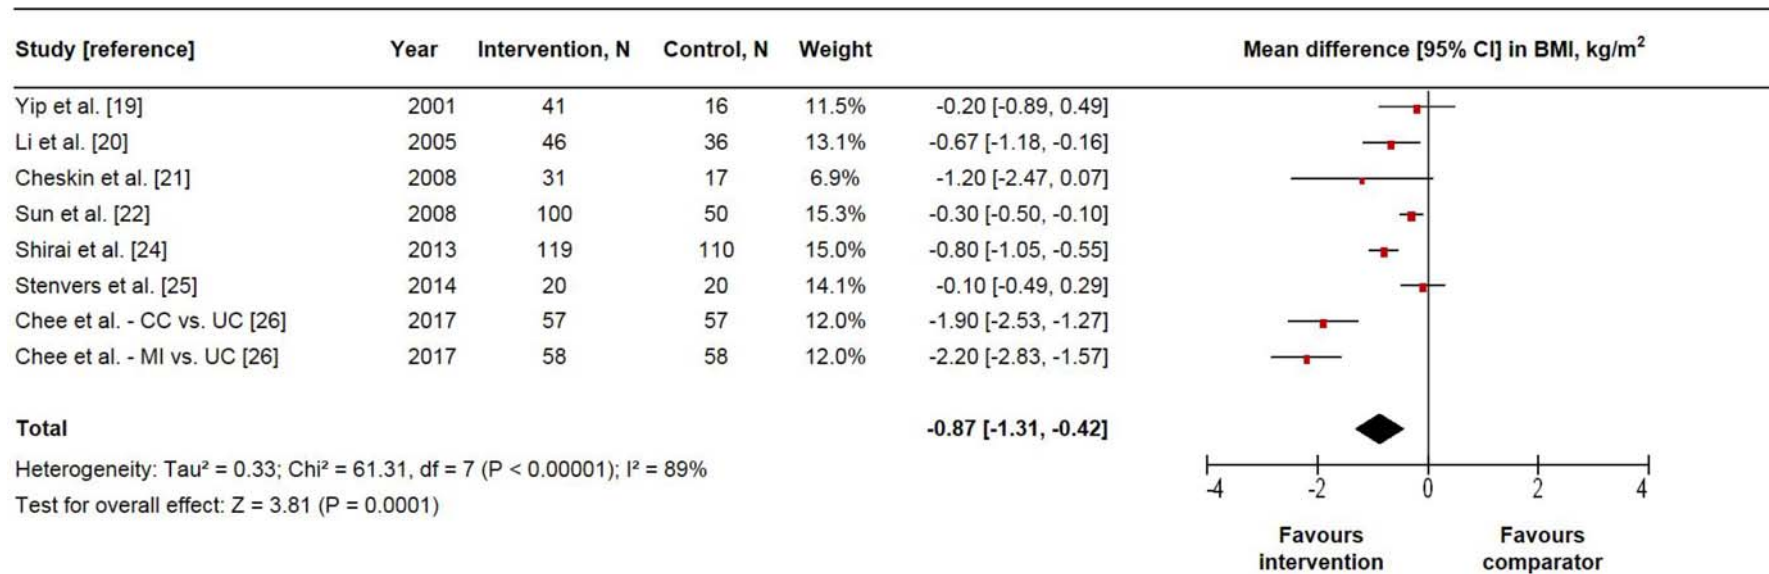

## SUPPLEMENTARY DATA

**Supplementary Figure 5.** Forest plot of the effect of liquid meal replacements as part of a weight loss diet (intervention) compared with traditional low-calorie weight loss diets (comparator) on body fat. Pooled effect estimates for the overall effect is represented by the diamond. Data are expressed as mean differences (MDs) with 95% confidence intervals (CIs), using the generic inverse variance method with fixed-effects models. Paired analyses were applied to all crossover trials. Interstudy heterogeneity was tested by the Cochran Q-statistic at a significance level of  $P_Q < 0.10$  and quantified by  $I^2$ . CC, conventional counselling; MI, motivational interviewing; UC, usual care.

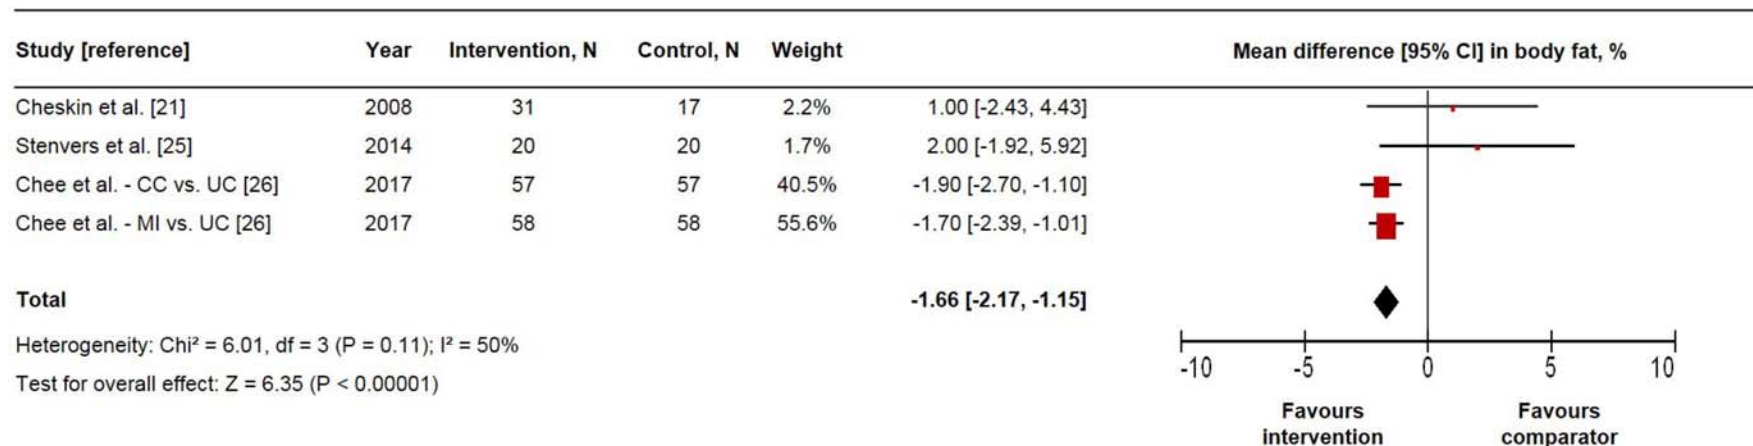



## SUPPLEMENTARY DATA

**Supplementary Figure 6.** Forest plot of the effect of liquid meal replacements as part of a weight loss diet (intervention) compared with traditional low-calorie weight loss diets (comparator) on waist circumference. Pooled effect estimates for the overall effect is represented by the diamond. Data are expressed as mean differences (MDs) with 95% confidence intervals (CIs), using the generic inverse variance method with random-effects models. Paired analyses were applied to all crossover trials. Interstudy heterogeneity was tested by the Cochran Q-statistic at a significance level of  $P_Q < 0.10$  and quantified by  $I^2$ . CC, conventional counselling; MI, motivational interviewing; UC, usual care.

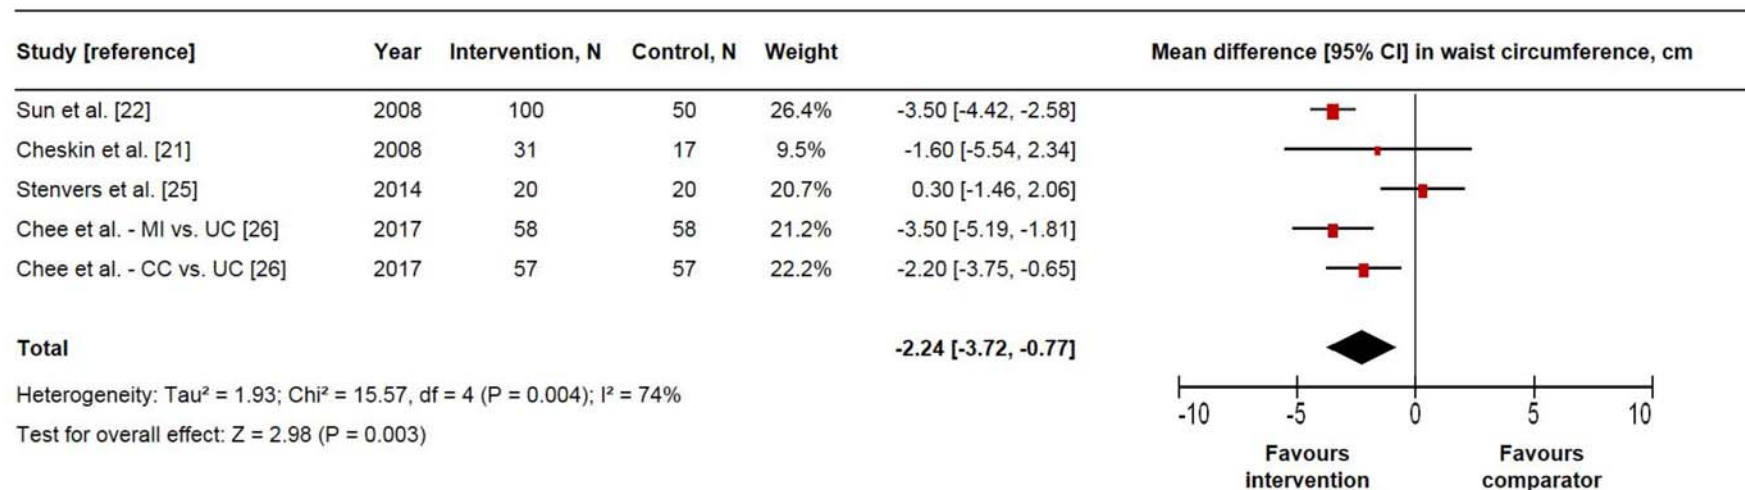

## SUPPLEMENTARY DATA

**Supplementary Figure 7.** Forest plot of the effect of liquid meal replacements as part of a weight loss diet (intervention) compared with traditional low-calorie weight loss diets (comparator) on HbA<sub>1c</sub>. Pooled effect estimates for the overall effect is represented by the diamond. Data are expressed as mean differences (MDs) with 95% confidence intervals (CIs), using the generic inverse variance method with random-effects models. Paired analyses were applied to all crossover trials. Interstudy heterogeneity was tested by the Cochran Q-statistic at a significance level of  $P_Q < 0.10$  and quantified by  $I^2$ . CC, conventional counselling; MI, motivational interviewing; UC, usual care.

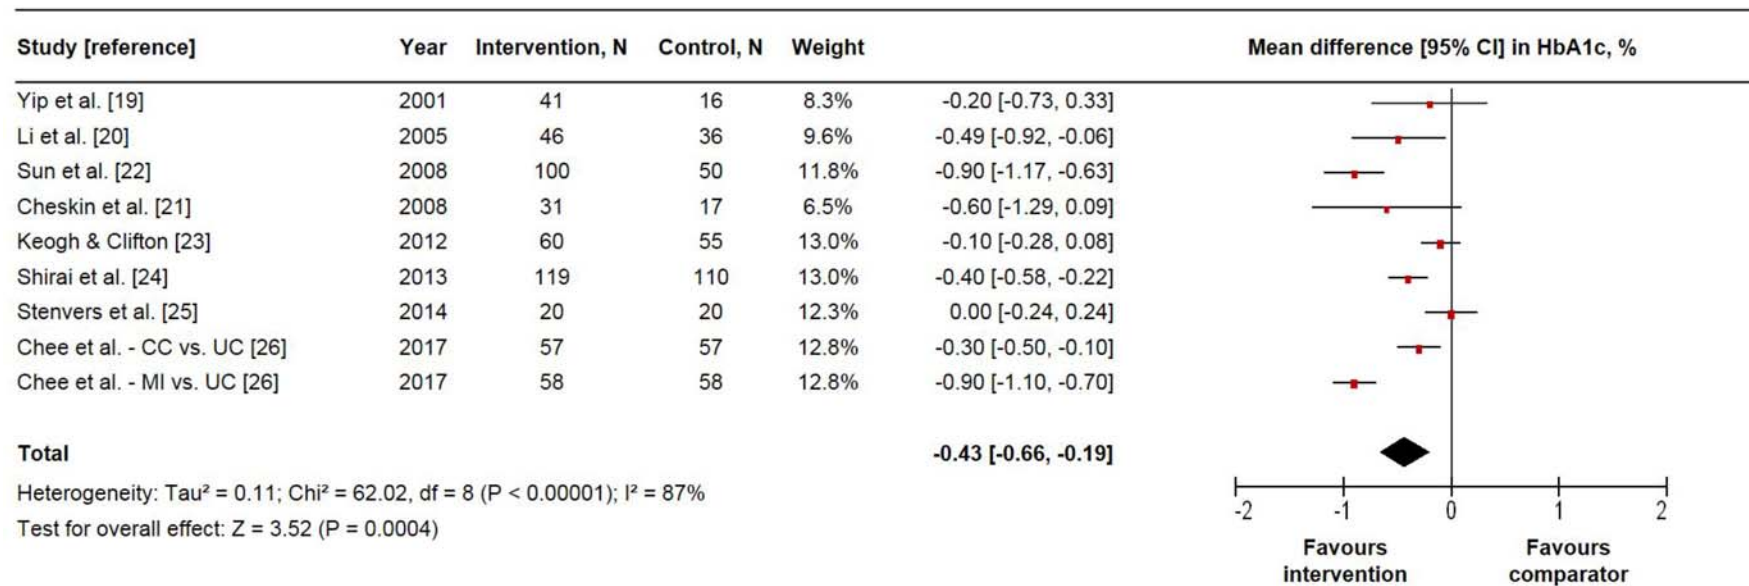

## SUPPLEMENTARY DATA

**Supplementary Figure 8.** Forest plot of the effect of liquid meal replacements as part of a weight loss diet (intervention) compared with traditional low-calorie weight loss diets (comparator) on fasting glucose. Pooled effect estimates for the overall effect is represented by the diamond. Data are expressed as mean differences (MDs) with 95% confidence intervals (CIs), using the generic inverse variance method with random-effects models. Paired analyses were applied to all crossover trials. Interstudy heterogeneity was tested by the Cochran Q-statistic at a significance level of  $P_Q < 0.10$  and quantified by  $I^2$ . CC, conventional counselling; MI, motivational interviewing; UC, usual care.

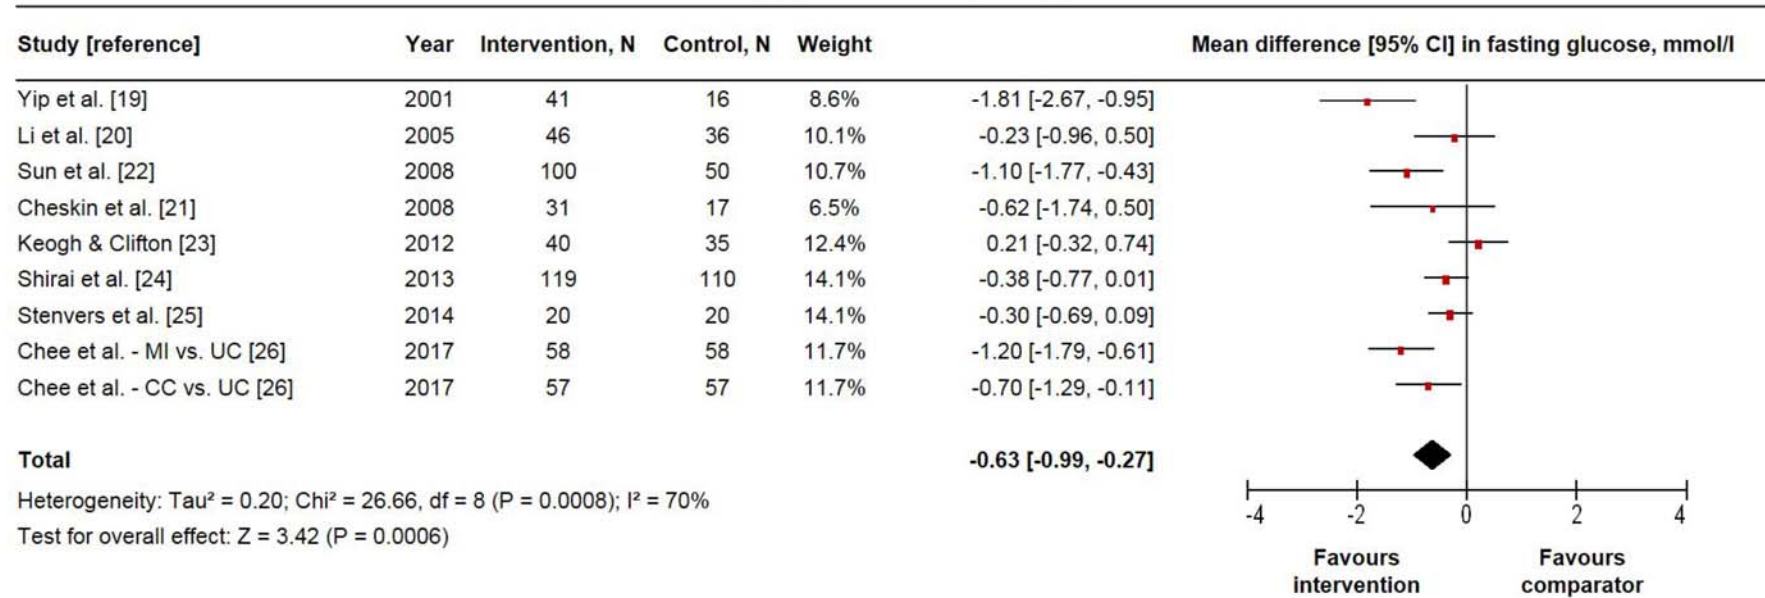

## SUPPLEMENTARY DATA

**Supplementary Figure 9.** Forest plot of the effect of liquid meal replacements as part of a weight loss diet (intervention) compared with traditional low-calorie weight loss diets (comparator) on fasting insulin. Pooled effect estimates for the overall effect is represented by the diamond. Data are expressed as mean differences (MDs) with 95% confidence intervals (CIs), using the generic inverse variance method with random-effects models. Paired analyses were applied to all crossover trials. Interstudy heterogeneity was tested by the Cochran Q-statistic at a significance level of  $P_Q < 0.10$  and quantified by  $I^2$ .

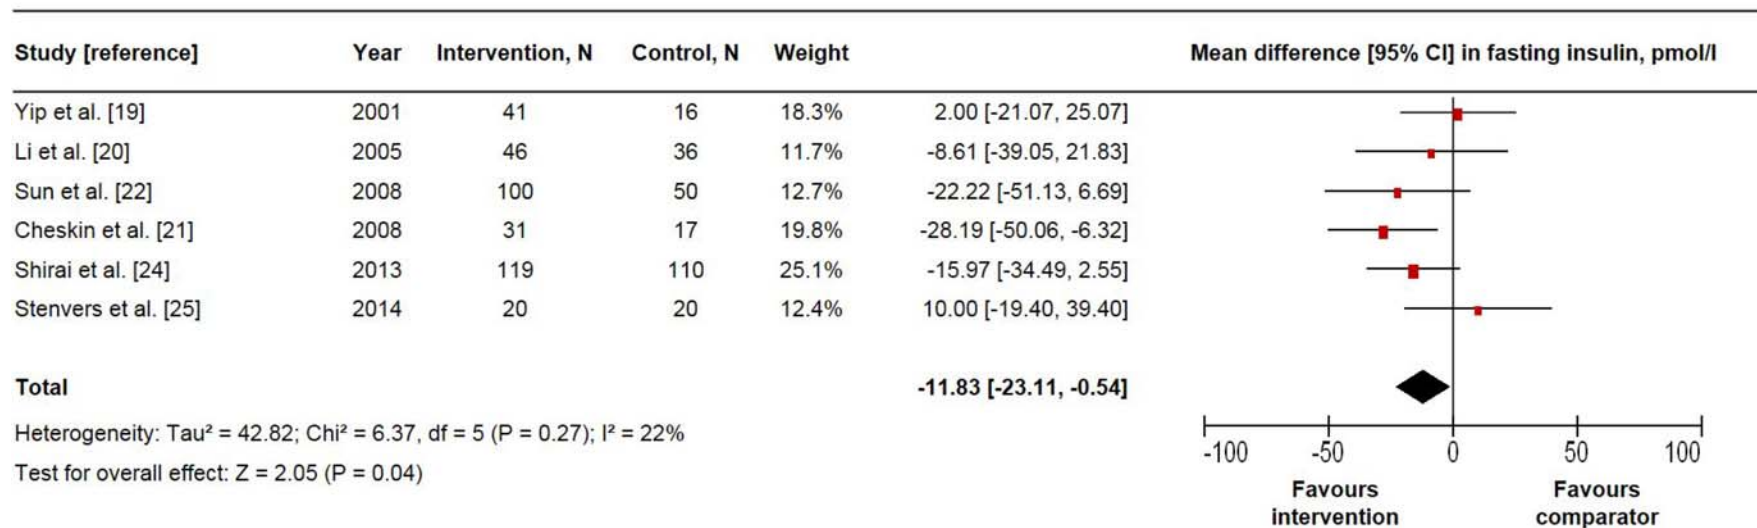

## SUPPLEMENTARY DATA

**Supplementary Figure 10.** Forest plot of the effect of liquid meal replacements as part of a weight loss diet (intervention) compared with traditional low-calorie weight loss diets (comparator) on LDL-c. Pooled effect estimates for the overall effect is represented by the diamond. Data are expressed as mean differences (MDs) with 95% confidence intervals (CIs), using the generic inverse variance method with random-effects models. Paired analyses were applied to all crossover trials. Interstudy heterogeneity was tested by the Cochran Q-statistic at a significance level of  $P_Q < 0.10$  and quantified by  $I^2$ . CC, conventional counselling; MI, motivational interviewing; UC, usual care.

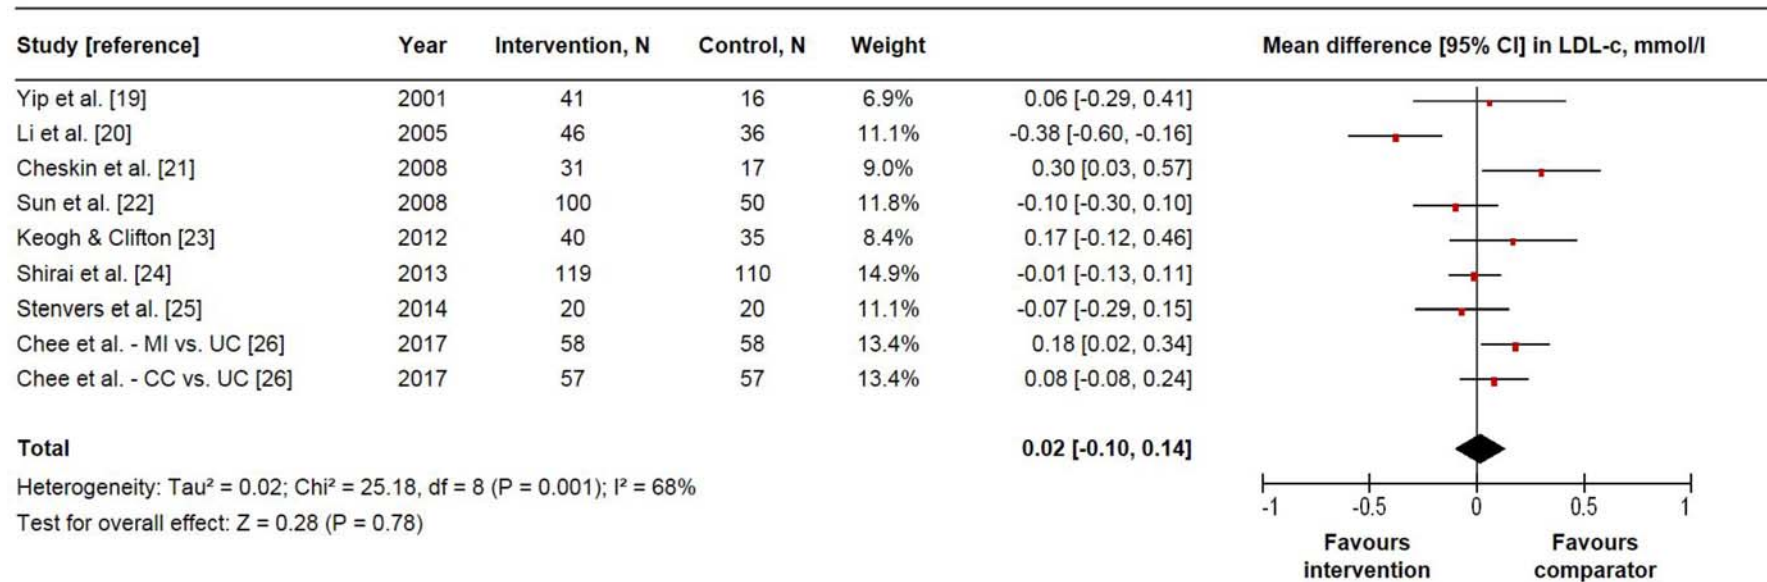

## SUPPLEMENTARY DATA

**Supplementary Figure 11.** Forest plot of the effect of liquid meal replacements as part of a weight loss diet (intervention) compared with traditional low-calorie weight loss diets (comparator) on HDL-c. Pooled effect estimates for the overall effect is represented by the diamond. Data are expressed as mean differences (MDs) with 95% confidence intervals (CIs), using the generic inverse variance method with random-effects models. Paired analyses were applied to all crossover trials. Interstudy heterogeneity was tested by the Cochran Q-statistic at a significance level of  $P_Q < 0.10$  and quantified by  $I^2$ . CC, conventional counselling; MI, motivational interviewing; UC, usual care.

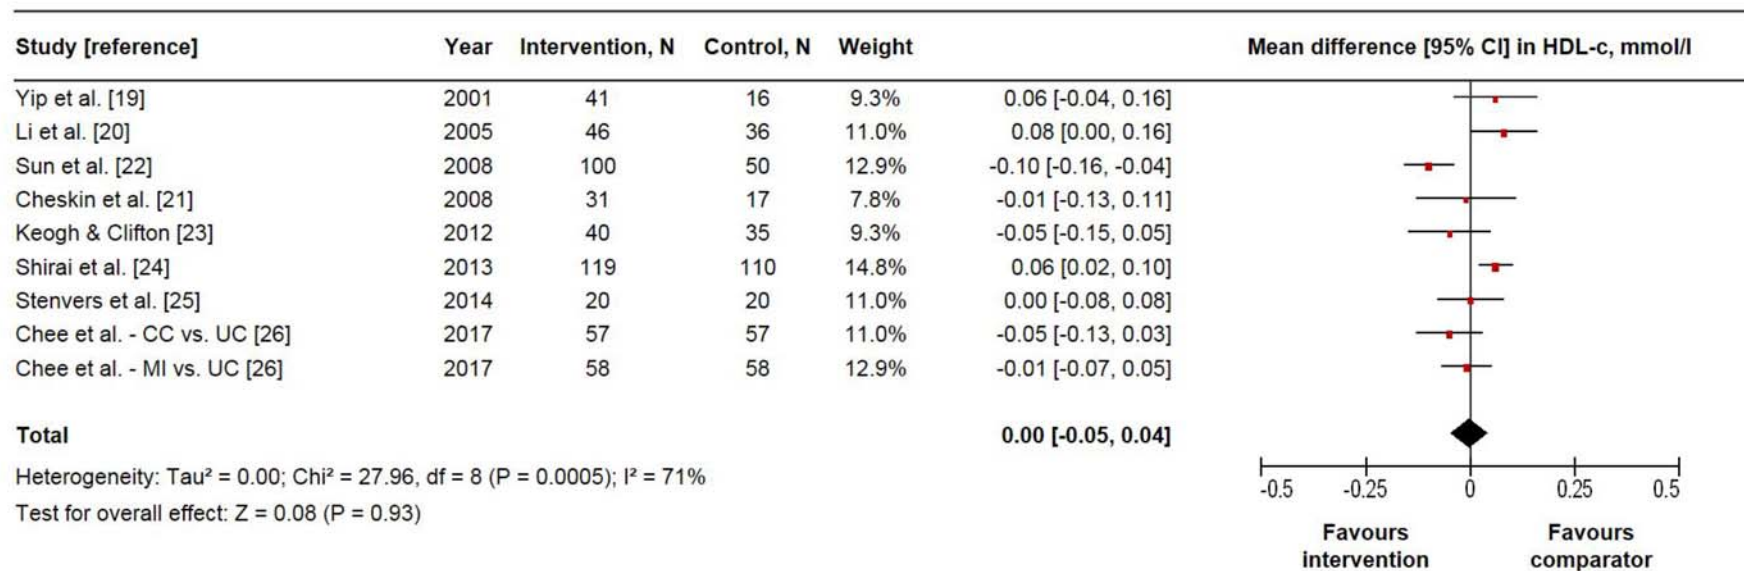



## SUPPLEMENTARY DATA

**Supplementary Figure 12.** Forest plot of the effect of liquid meal replacements as part of a weight loss diet (intervention) compared with traditional low-calorie weight loss diets (comparator) on non-HDL-c. Pooled effect estimates for the overall effect is represented by the diamond. Data are expressed as mean differences (MDs) with 95% confidence intervals (CIs), using the generic inverse variance method with random-effects models. Paired analyses were applied to all crossover trials. Interstudy heterogeneity was tested by the Cochran Q-statistic at a significance level of  $P_Q < 0.10$  and quantified by  $I^2$ . CC, conventional counselling; MI, motivational interviewing; UC, usual care.

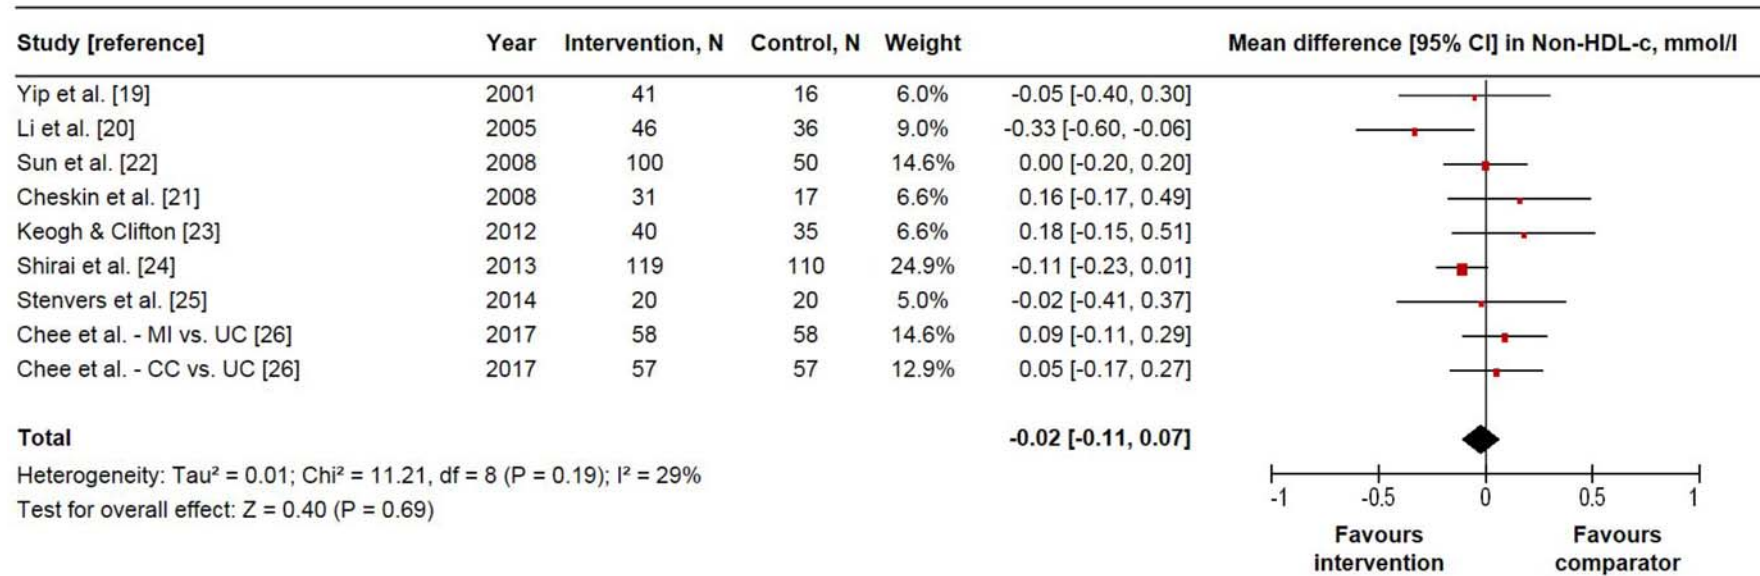

## SUPPLEMENTARY DATA

**Supplementary Figure 13.** Forest plot of the effect of liquid meal replacements as part of a weight loss diet (intervention) compared with traditional low-calorie weight loss diets (comparator) on triglycerides. Pooled effect estimates for the overall effect is represented by the diamond. Data are expressed as mean differences (MDs) with 95% confidence intervals (CIs), using the generic inverse variance method with random-effects models. Paired analyses were applied to all crossover trials. Interstudy heterogeneity was tested by the Cochran Q-statistic at a significance level of  $P_Q < 0.10$  and quantified by  $I^2$ . CC, conventional counselling; MI, motivational interviewing; UC, usual care.

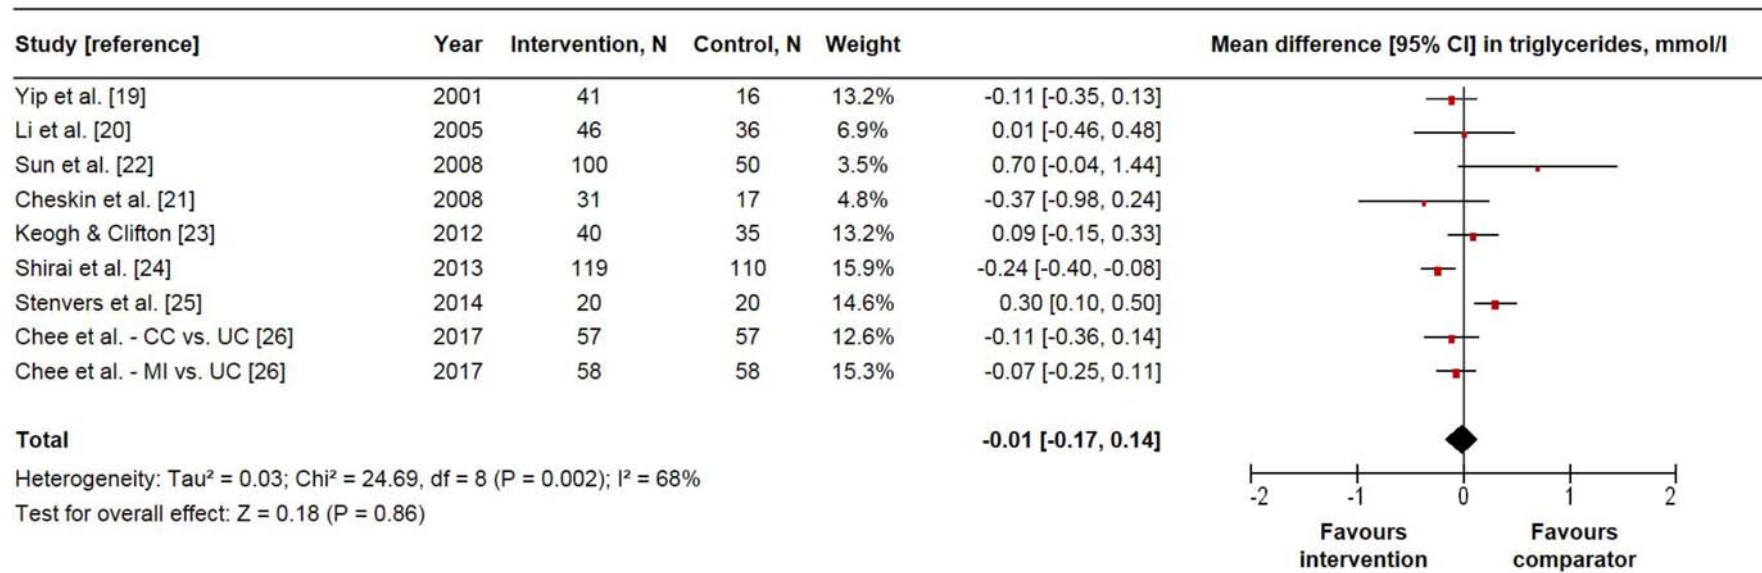



## SUPPLEMENTARY DATA

**Supplementary Figure 14.** Forest plot of the effect of liquid meal replacements as part of a weight loss diet (intervention) compared with traditional low-calorie weight loss diets (comparator) on systolic blood pressure. Pooled effect estimates for the overall effect is represented by the diamond. Data are expressed as mean differences (MDs) with 95% confidence intervals (CIs), using the generic inverse variance method with random-effects models. Paired analyses were applied to all crossover trials. Interstudy heterogeneity was tested by the Cochran Q-statistic at a significance level of  $P_Q < 0.10$  and quantified by  $I^2$ . CC, conventional counselling; MI, motivational interviewing; UC, usual care.

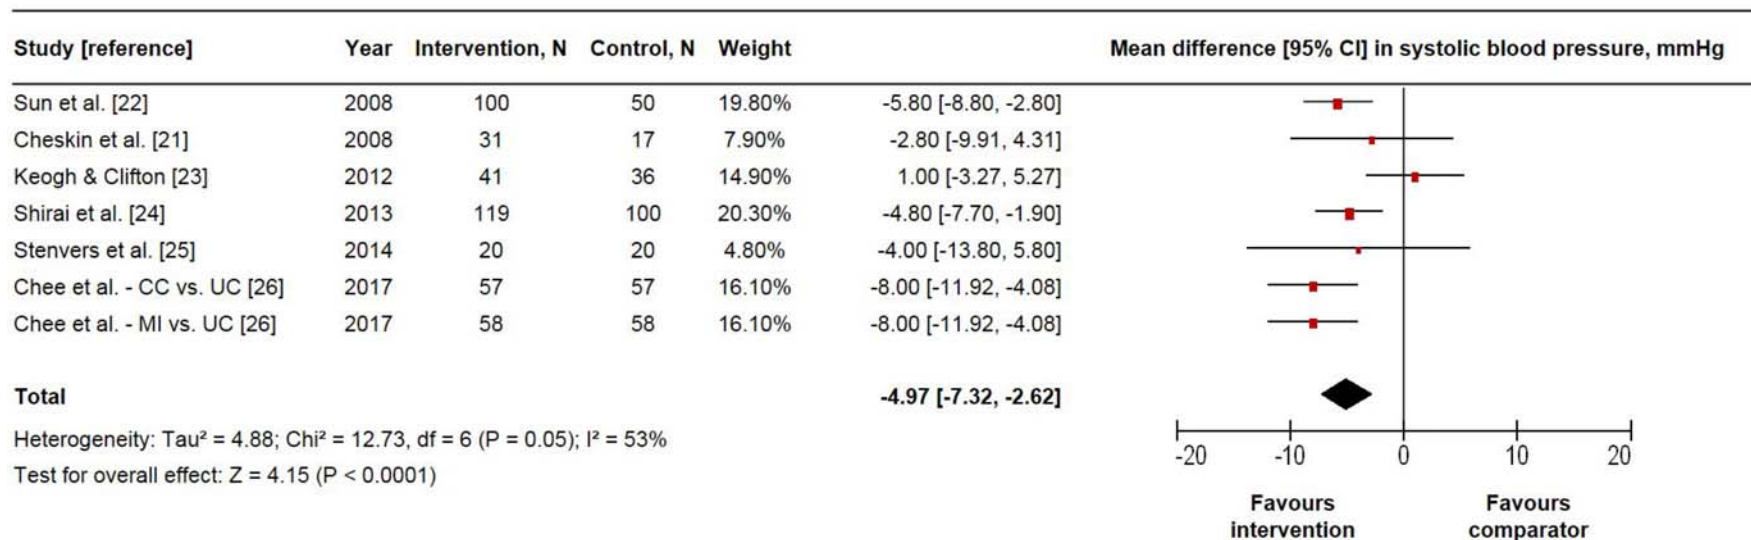

## SUPPLEMENTARY DATA

**Supplementary Figure 15.** Forest plot of the effect of liquid meal replacements as part of a weight loss diet (intervention) compared with traditional low-calorie weight loss diets (comparator) on diastolic blood pressure. Pooled effect estimates for the overall effect is represented by the diamond. Data are expressed as mean differences (MDs) with 95% confidence intervals (CIs), using the generic inverse variance method with random-effects models. Paired analyses were applied to all crossover trials. Interstudy heterogeneity was tested by the Cochran Q-statistic at a significance level of  $P_Q < 0.10$  and quantified by  $I^2$ . CC, conventional counselling; MI, motivational interviewing; UC, usual care.

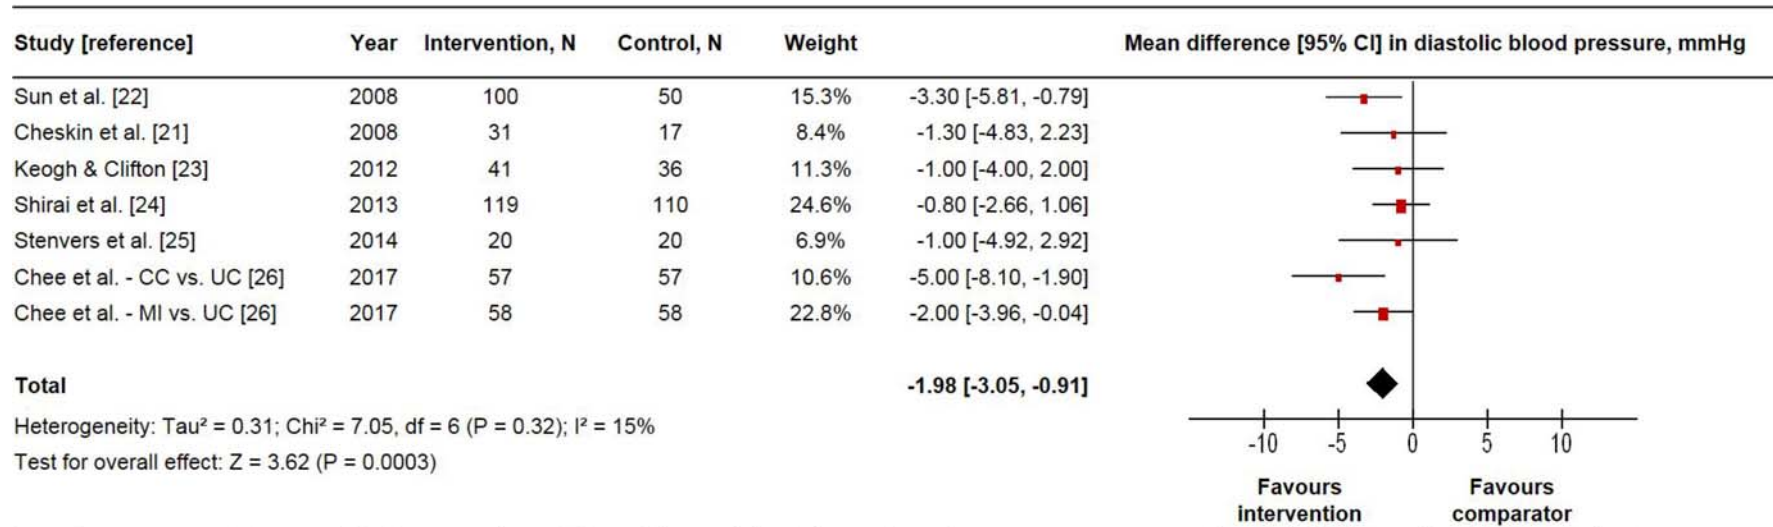

Supplement: dc182270supplementarydata.pdf [file dc182270supplementarydata.pdf]
